# Supplementary material for: Synergistic Hepatoprotective Interaction between &alpha;-Tocopherol and Ascorbic Acid on Paracetamol Induced Liver Damage in Rats
Source: Preprints.org preprint supplement (doi:10.20944/preprints202006.0122.v1), 2020-06-09
Supplement: Supplementary file 1 [file supplementary]

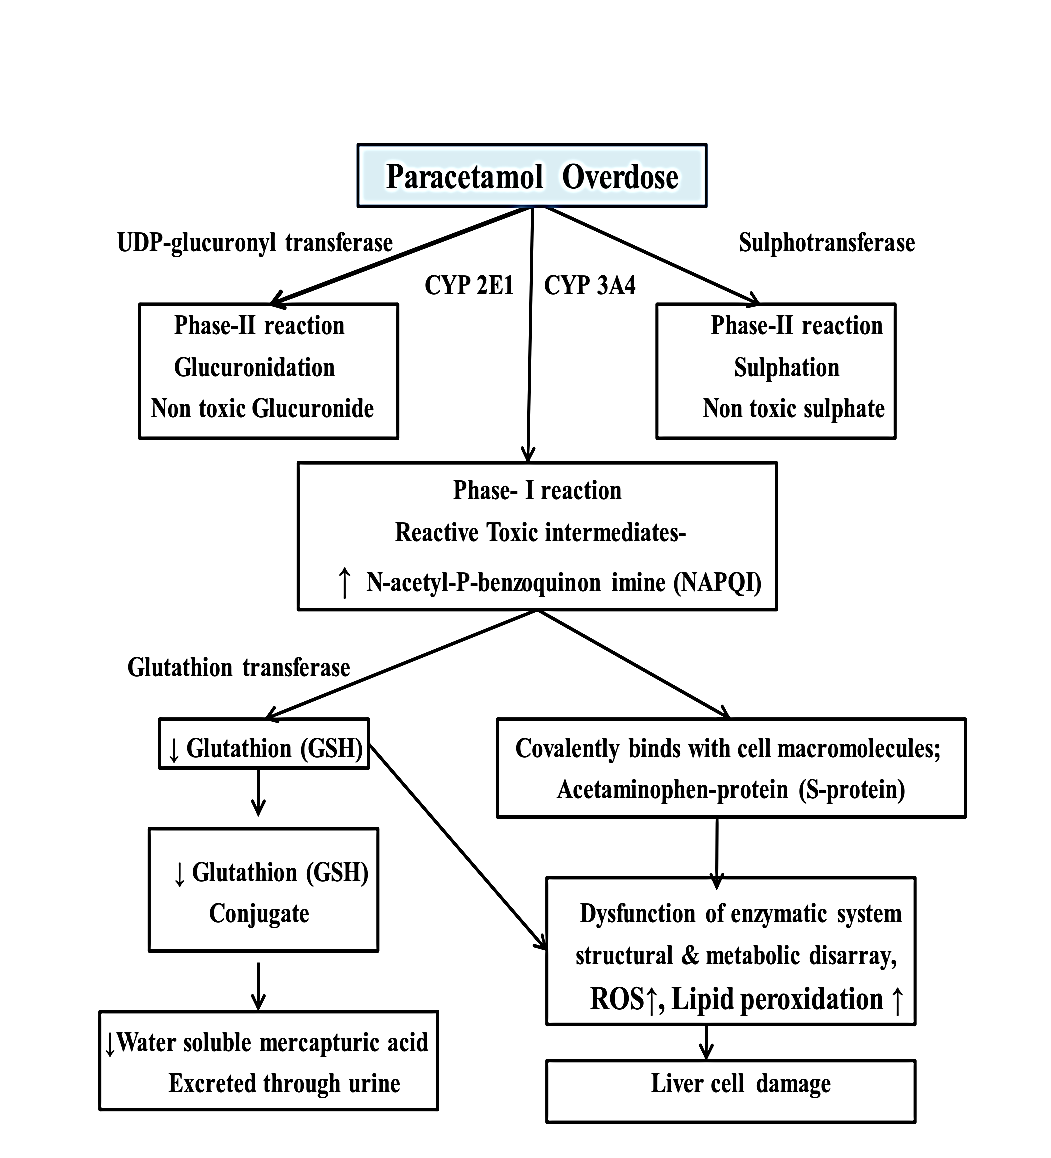


**Figure S1**: Possible mechanism of paracetamol induced hepatotoxicity


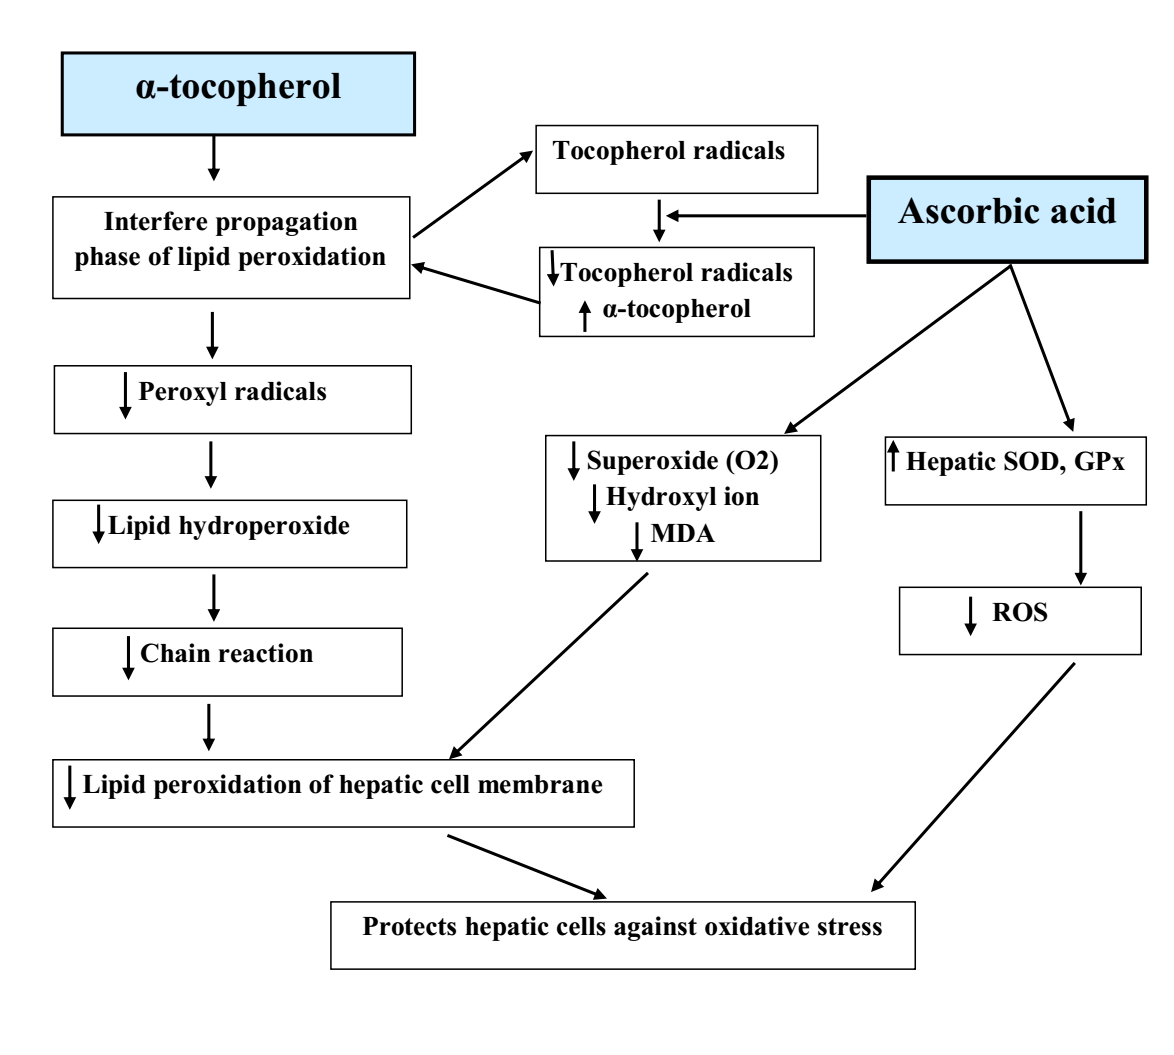


**Figure S2**: Possible mechanism of antioxidant effect of α-tocopherol & ascorbic acid
